# Supplementary material
Source: HighWire-hosted journal article supplement (http://ajnr-stage2.highwire.org/highwire/filestream/97483/field_highwire_adjunct_files/0/1165.pdf)
Supplement: 1165.pdf [file 1165.pdf]

## **ONLINE SUPPLEMENTAL DATA**

**Supplemental Online Figure 1.** Illustration of freehand contouring of an HPV+OPSCC across its largest cross-sectional area on T2, b=1000 and ADC images (upper figure row). The ADC image used for segmentation corresponded to the ADC map used in clinical routine generated automatically by the MRI scanner software (6 b-values). The same ROI was then copied on all studied ADC maps obtained with different b-value combinations (lower row).

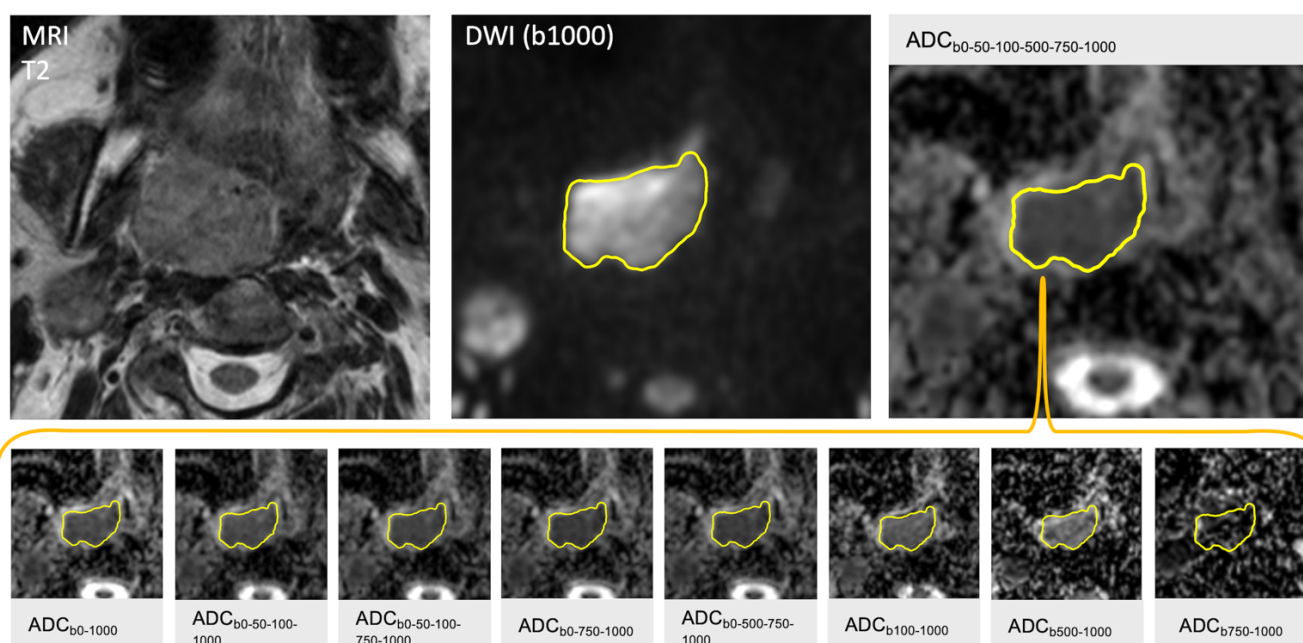

**Supplemental Online Figure 2.** To facilitate visual comparison between tumor ROIs on different ADC maps, a customized color-map for all ADC gray levels was used. A histogram was computed for all tumor ROIs of all patients. Then the normalized cumulative sum of this histogram was calculated, which resulted in a corresponding color-map for all gray levels. The UCLA-colormap was chosen to display the original gray levels (unit in  $\times 10^{-6} \text{ mm}^2/\text{s}$ ). With this procedure, the range of gray levels containing the majority of pixels are displayed with a wide range of colors allowing improved visual differentiation between small changes in ADC pixel values, which may be more difficult to observe on standard gray scale images.

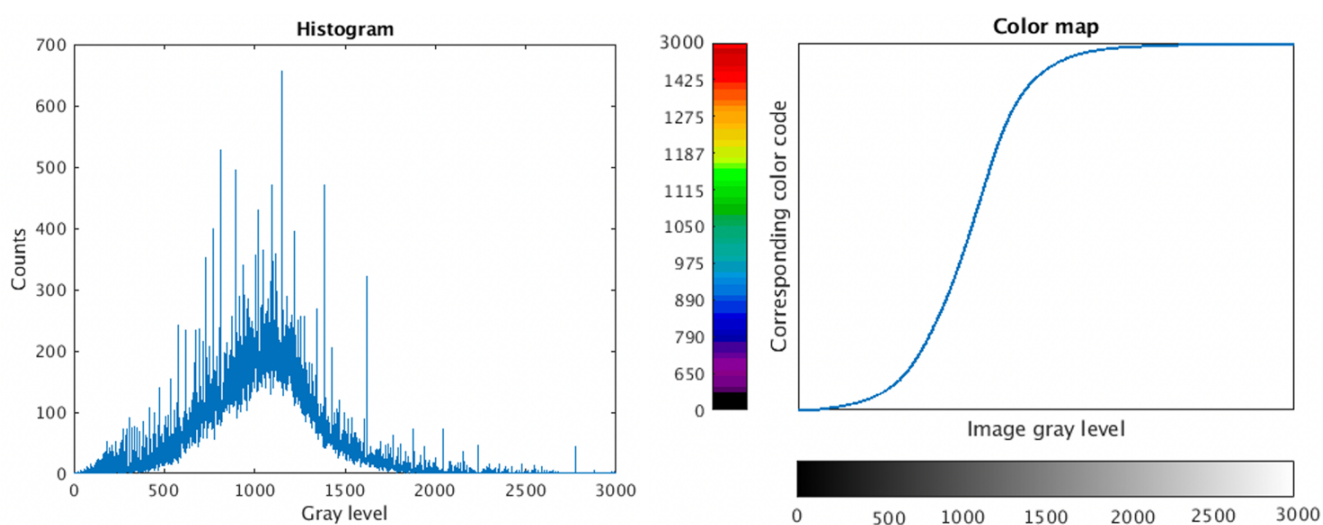

**Supplemental Online Figure 3.** Boxplots of ADC mean values in HPV- and HPV+OPSCC calculated for each combination of b-values. ADC mean values are indicated in  $10^{-6} \times \text{mm}^2/\text{s}$ . Median values are shown as bold lines, the 1<sup>st</sup> and 3<sup>rd</sup> quartiles are the limit of the box, whiskers extent to  $\pm 1.5 \times$  interquartile range, and outliers are represented with circles. P values were calculated with the Mann-Whitney-Wilcoxon test. ADC mean values in HPV- versus HPV+OPSCC were significantly lower only for  $\text{ADC}_{b0-1000}$ ,  $\text{ADC}_{b0-750-1000}$  and  $\text{ADC}_{b0-500-750-1000}$ , however, not for all other six combinations. In particular, ADC mean values in HPV- and HPV+OPSCC were similar on ADC maps calculated with  $b \geq 100 \text{ s/mm}^2$ .

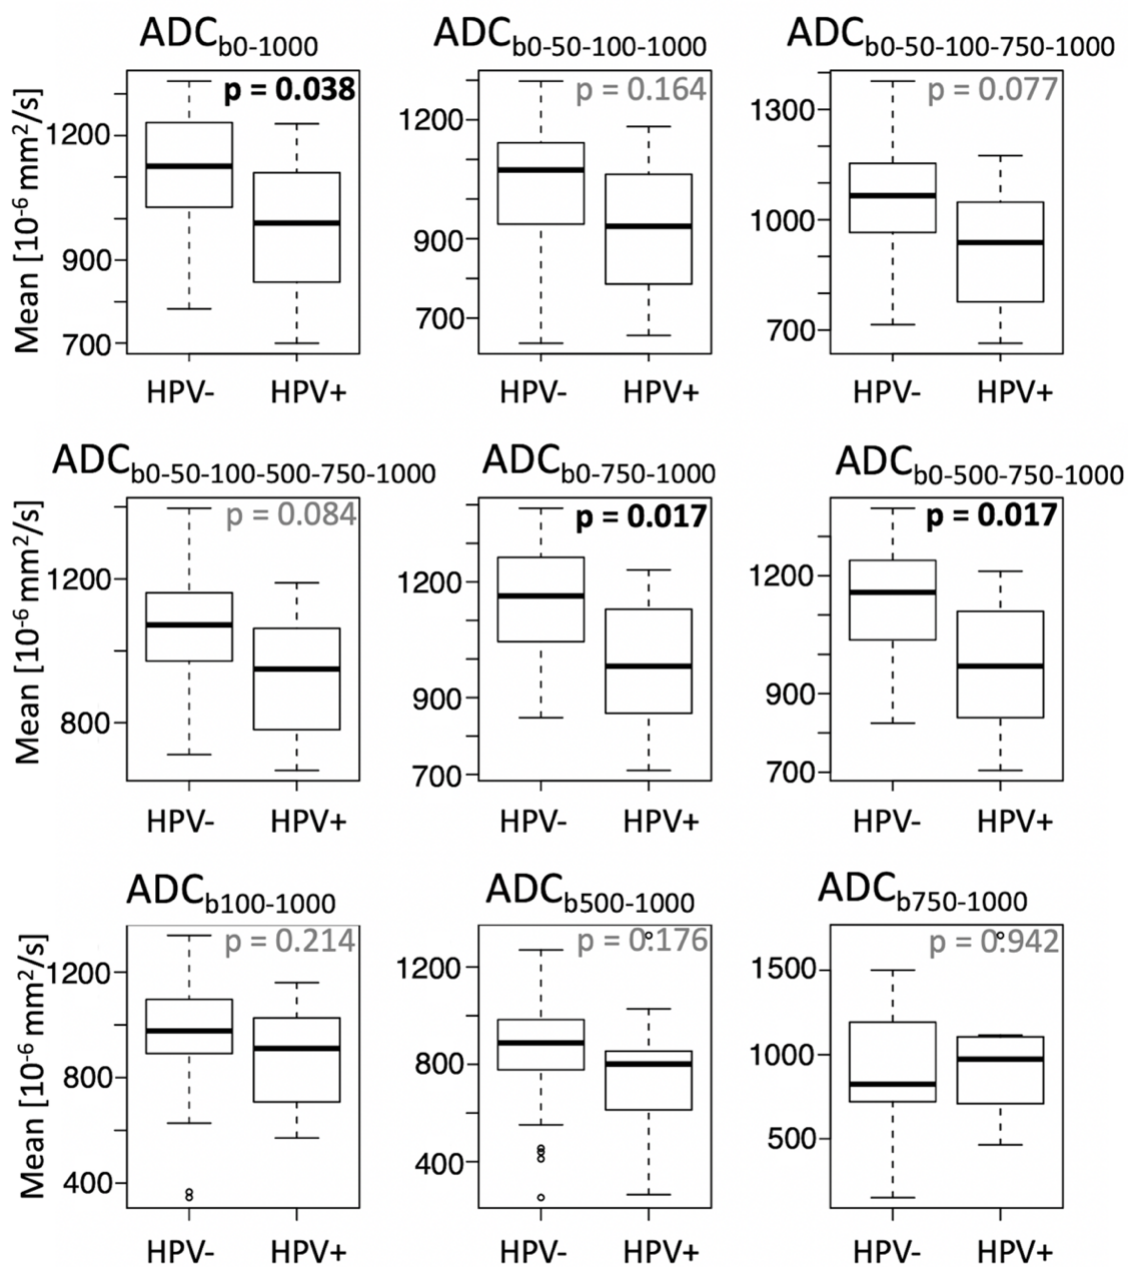

**Supplemental Online Figure 4.** Boxplots of ADC skewness in HPV- and HPV+OPSCC calculated for each combination of b-values. Median values are shown as bold lines, the 1<sup>st</sup> and 3<sup>rd</sup> quartiles are the limit of the box, whiskers extent to  $\pm 1.5 \times$  interquartile range, and outliers are represented with circles. P values were calculated with the Mann-Whitney-Wilcoxon test. ADC skewness in HPV-OPSCC was significantly lower than in HPV+OPSCC only for three combinations of b-values ( $ADC_{b0-1000}$ ,  $ADC_{b0-750-1000}$ ,  $ADC_{b0-500-750-1000}$ ), however, not for all other combinations. In particular, ADC skewness in HPV- and HPV+OPSCC was similar on perfusion-insensitive ADC maps calculated with  $b \geq 100s/mm^2$ .

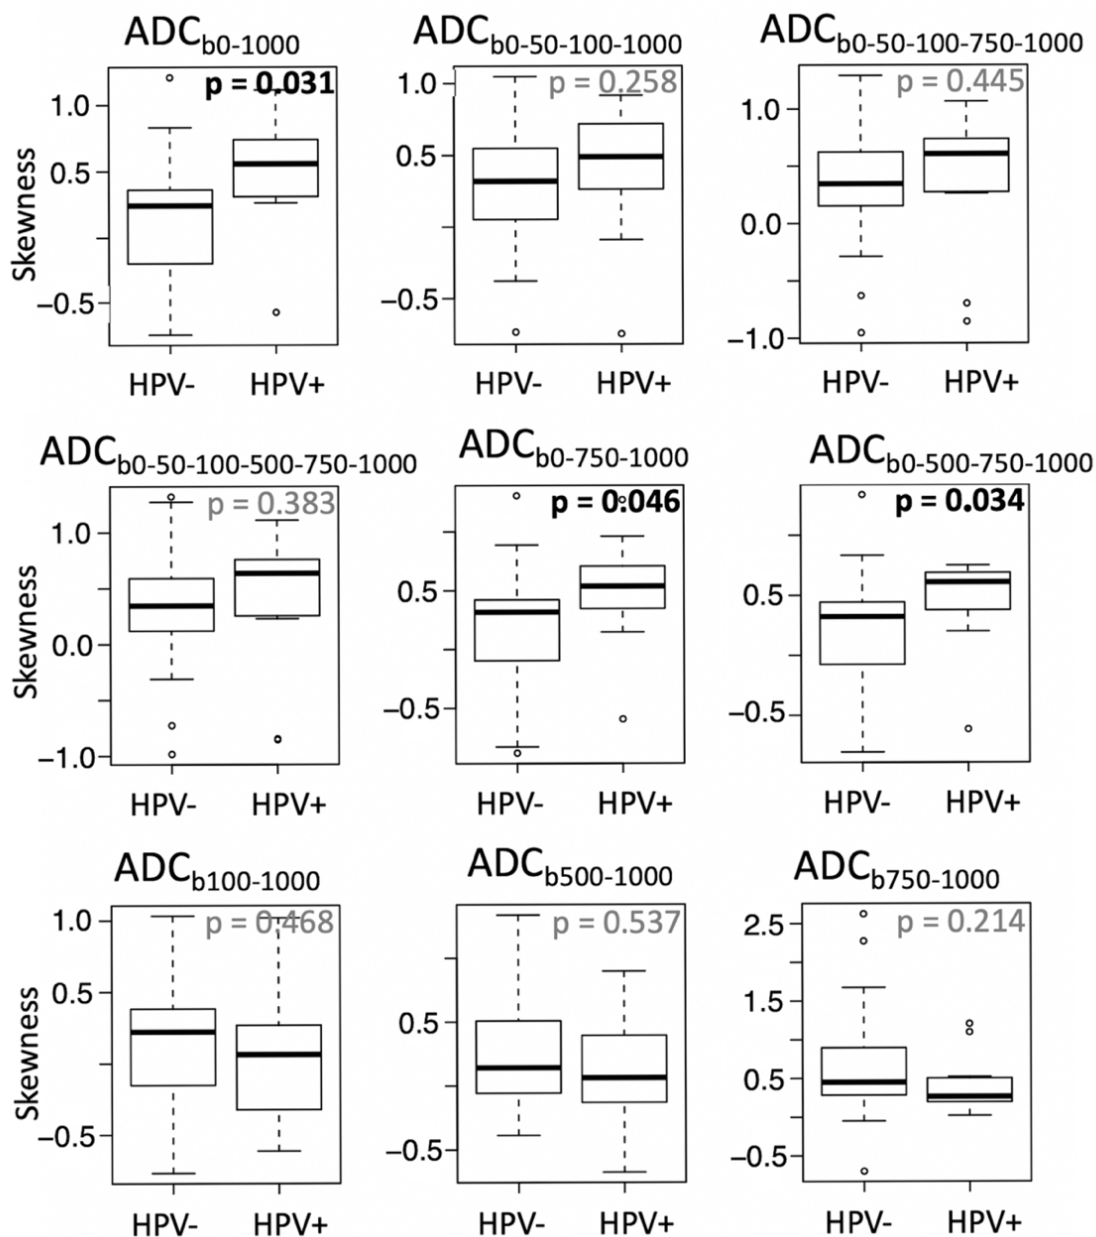



**Supplemental Online Figure 5.** Boxplots of ADC excess kurtosis in HPV- and HPV+OPSCC calculated for each combination of b-values. Median values are shown as bold lines, the 1<sup>st</sup> and 3<sup>rd</sup> quartiles are the limit of the box, whiskers extent to  $\pm 1.5 \times$  interquartile range, and outliers are represented with circles. P values were calculated with the Mann-Whitney-Wilcoxon test. Note that ADC excess kurtosis in HPV- versus HPV+OPSCC was significantly lower ( $p < 0.05$ ) for all combinations of b-values with the exception of ADC excess kurtosis calculated with  $b \geq 500 \text{ s/mm}^2$  ( $\text{ADC}_{b500-1000}$  and  $\text{ADC}_{b750-1000}$ ).

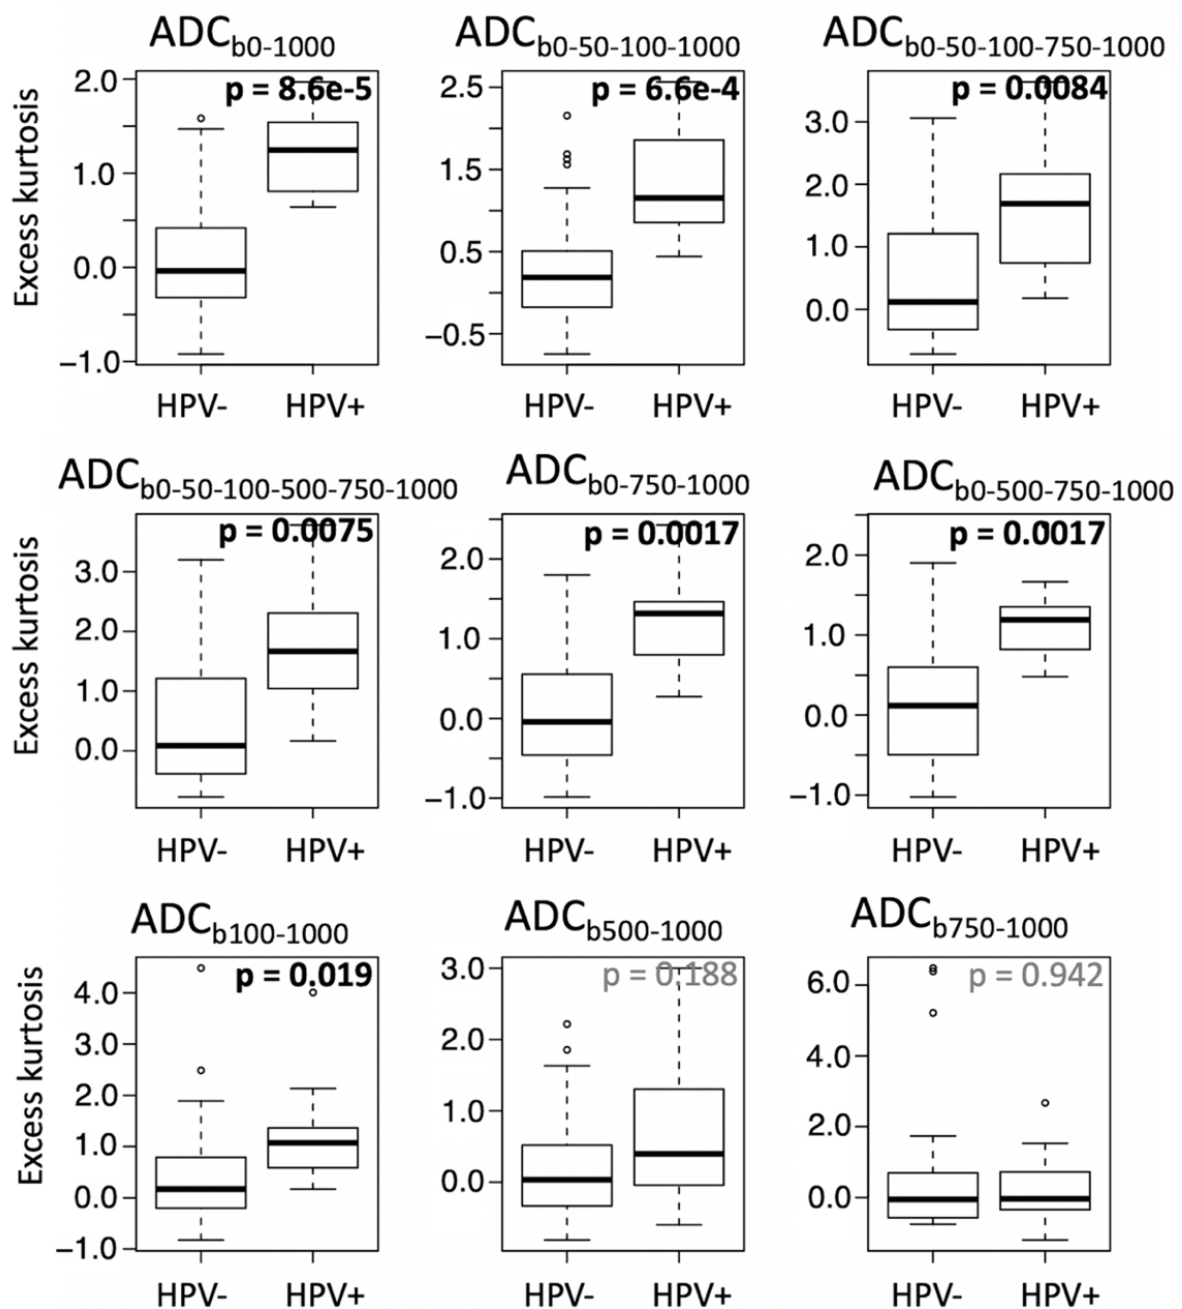

**Supplemental Online Table 1.** Same data as in **Table 4** but with AUCs calculated with a leave-one-out cross-validation and with LDA as model. P values to distinguish HPV+ from HPV-OPSCC were calculated with the Mann-Whitney-Wilcoxon test. Sensitivity, specificity and accuracy were calculated with the optimal threshold extracted from LDA scores.

| ADC map                        | Feature                   | AUC   | p-value | TP | FP | TN | FN | Sensitivity | Specificity | Accuracy | Optimal threshold     |
|--------------------------------|---------------------------|-------|---------|----|----|----|----|-------------|-------------|----------|-----------------------|
| ADC <sub>b0-1000</sub>         | ADC mean                  | 0.719 | 0.021   | 8  | 7  | 16 | 3  | 0.727       | 0.696       | 0.706    | 1049.295 <sup>a</sup> |
|                                | ADC skewness              | 0.731 | 0.016   | 8  | 6  | 17 | 3  | 0.727       | 0.739       | 0.735    | 0.348                 |
|                                | ADC kurtosis <sup>b</sup> | 0.889 | <0.001  | 11 | 4  | 19 | 0  | 1.000       | 0.826       | 0.882    | 0.581                 |
| ADC <sub>b0-750-1000</sub>     | ADC mean                  | 0.743 | 0.012   | 8  | 7  | 16 | 3  | 0.727       | 0.695       | 0.706    | 1077.717 <sup>a</sup> |
|                                | ADC skewness              | 0.715 | 0.023   | 8  | 5  | 18 | 3  | 0.727       | 0.783       | 0.765    | 0.459                 |
|                                | ADC kurtosis <sup>b</sup> | 0.826 | 0.001   | 10 | 5  | 18 | 1  | 0.909       | 0.783       | 0.823    | 0.600                 |
| ADC <sub>b0-500-750-1000</sub> | ADC mean                  | 0.743 | 0.012   | 8  | 5  | 18 | 3  | 0.727       | 0.783       | 0.765    | 1032.304 <sup>a</sup> |
|                                | ADC skewness              | 0.727 | 0.017   | 8  | 4  | 19 | 3  | 0.727       | 0.826       | 0.794    | 0.515                 |
|                                | ADC kurtosis <sup>b</sup> | 0.826 | 0.001   | 10 | 5  | 18 | 1  | 0.909       | 0.783       | 0.823    | 0.607                 |
| ADC <sub>b100-1000</sub>       | ADC mean                  | 0.632 | 0.114   | 8  | 8  | 15 | 3  | 0.727       | 0.652       | 0.676    | 952.723 <sup>a</sup>  |
|                                | ADC skewness              | 0.581 | 0.234   | 8  | 11 | 12 | 3  | 0.727       | 0.522       | 0.588    | 0.211                 |
|                                | ADC kurtosis <sup>b</sup> | 0.751 | 0.009   | 9  | 7  | 16 | 2  | 0.818       | 0.696       | 0.735    | 0.442                 |

a=ADC mean thresholds in  $\times 10^{-6} \text{mm}^2/\text{s}$ ; b=excess kurtosis.
